# Supplementary material
Source: PubMed Central journal article supplement (PMC3076122)
Supplement: NIHMS273111-supplement-Supp1.pdf [file NIHMS273111-supplement-Supp1.pdf]

## Supplemental Material

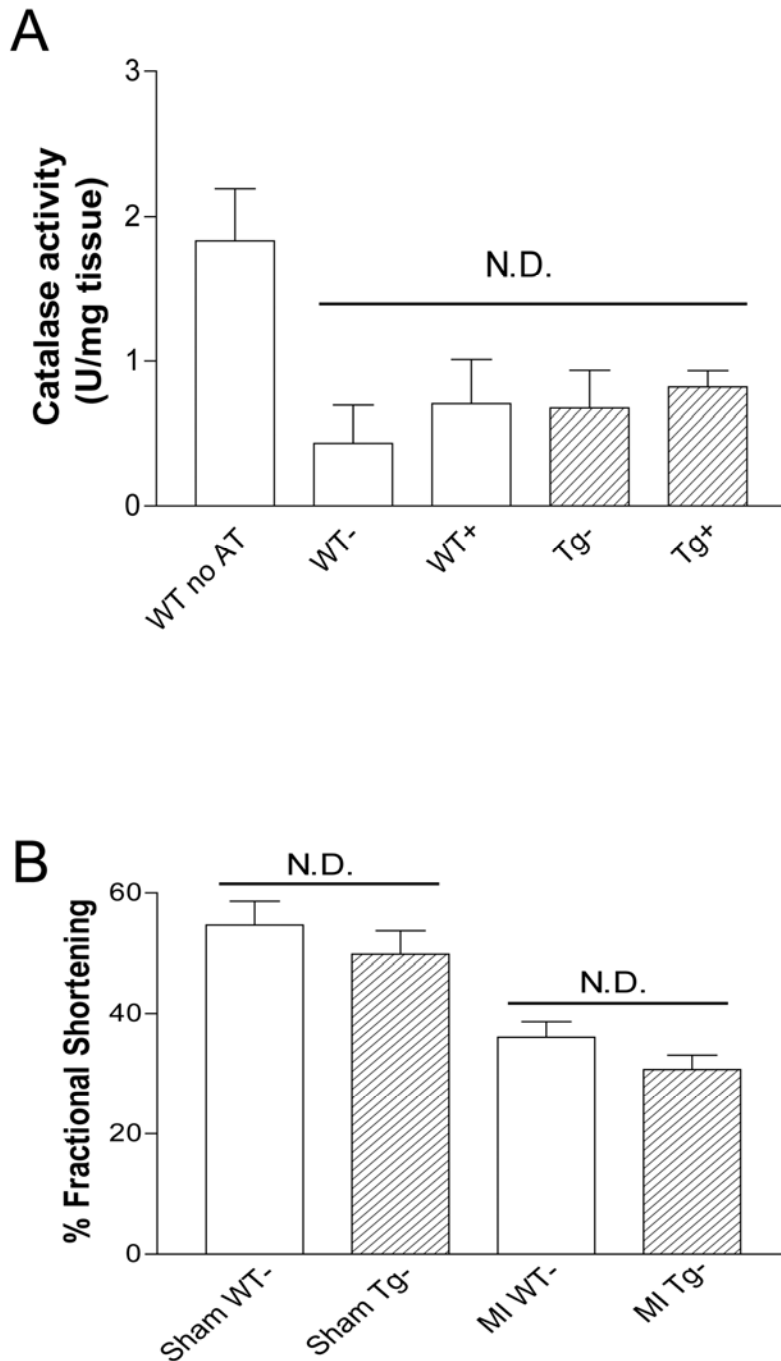

**Supplemental Figure 1. Specificity of Cre recombinase upregulation on catalase activity and cardiac function over time.** A. Addition of 3-aminotriazole (AT) abolished increase in catalase activity in catalase overexpressing mice (Tg) treated with tamoxifen (Tg+), indicating increase was not due to another peroxidase. All groups treated with AT unless indicated. B) Expression of Cre recombinase did not alter cardiac function. Wild-type mice were not statistically different from vehicle-treated transgenic (Tg-) mice after sham or MI surgery. Statistical comparisons were made by ANOVA (A,  $p < 0.001$ ; B,  $p = 0.003$ ) followed by Tukey-Kramer post test.  $n = 5-9$  hearts per group.

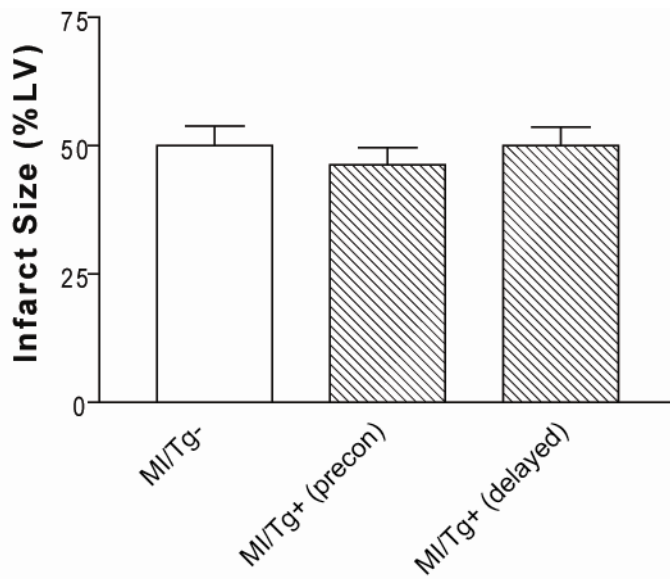

**Supplemental Figure 2. Infarct size measurements.** Infarct size was measured acutely (1 day) following infarction with magnetic resonance imaging (delayed contrast enhancement of gadolinium). There were no significant differences between the groups by ANOVA ( $p=0.79$ ;  $n\geq 3$ ).
